# Supplementary material for: Flood damage: a model for consistent, complete and multipurpose scenarios
Source: Copernicus journal article supplement (doi:10.5194/nhess-16-2783-2016), 2016-12-21
Supplement: Supplementary file 1 [file nhess-16-2783-2016-supplement.pdf]

Supplement of Nat. Hazards Earth Syst. Sci., 16, 2783–2797, 2016  
<http://www.nat-hazards-earth-syst-sci.net/16/2783/2016/>  
doi:10.5194/nhess-16-2783-2016-supplement  
© Author(s) 2016. CC Attribution 3.0 License.

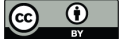

*Supplement of*

## **Flood damage: a model for consistent, complete and multipurpose scenarios**

**S. Menoni et al.**

*Correspondence to:* Scira Menoni ([scira.menoni@polimi.it](mailto:scira.menoni@polimi.it))

The copyright of individual parts of the supplement might differ from the CC-BY 3.0 licence.

3

4 **Supplement: The 2012 flood in the Umbria Region – Reported damage**

5

| EXPOSED SECTOR | SPATIAL SCALES OF ANALYSIS         |                                                    |                                                                                                                                     |                                                                                                            |
|----------------|------------------------------------|----------------------------------------------------|-------------------------------------------------------------------------------------------------------------------------------------|------------------------------------------------------------------------------------------------------------|
|                | Type of damage                     | Individual item                                    | Municipality                                                                                                                        | Meso - Macro scale<br>(Province, Region, Country)                                                          |
| population     | physical damage                    | X                                                  | INJURED PEOPLE:<br>some people suffered because of humidity in residences or work places                                            |                                                                                                            |
|                | evacuated people                   |                                                    | EVACUATED PEOPLE:<br>255 evacuated families in 11 municipalities, most of them from Marsciano (90 families) and Todi (70 families). |                                                                                                            |
|                | psychological distress             | STRESS:<br>some business owners suffered of stress |                                                                                                                                     |                                                                                                            |
|                | unemployment, loss in salary, etc. |                                                    |                                                                                                                                     | JOB DISRUPTION<br>(INVESTIGATED SITES):<br>some business owners declared layoff during business disruption |
|                | lack of services                   |                                                    | LACK OF SERVICES<br>(SCHOOLS AND HOSPITAL)                                                                                          | LACK OF SERVICES<br>(TRANSPORTATION,<br>ELECTRICITY, AND<br>SEWAGE SERVICE)                                |

| EXPOSED SECTOR                                  |             | SPATIAL SCALES OF ANALYSIS                 |                                                                                                                                                |                                                                  |                                                                                  |
|-------------------------------------------------|-------------|--------------------------------------------|------------------------------------------------------------------------------------------------------------------------------------------------|------------------------------------------------------------------|----------------------------------------------------------------------------------|
|                                                 |             | Type of damage                             | Individual item                                                                                                                                | Municipality                                                     | Meso - Macro scale<br>(Province, Region, Country)                                |
| infrastructures<br>(installations<br>and lines) | roads       | physical damage                            | PHYSICAL DAMAGE TO<br>ROADS AND BRIDGES<br>12.200.000 €                                                                                        |                                                                  |                                                                                  |
|                                                 |             | functional disruption                      |                                                                                                                                                | DISRUPTED ROADS:<br>data on closed roads in each<br>municipality | DISRUPTED ROADS:<br>disruption for goods<br>transportation by trucks: 10<br>days |
|                                                 |             | physical and functional<br>systemic damage |                                                                                                                                                | X                                                                | X                                                                                |
|                                                 | railways    | physical damage                            | PHYSICAL DAMAGE:<br>- observed damages: railways,<br>train deposits, stations,<br>mechanic workshops<br>1.100.000 €                            |                                                                  |                                                                                  |
|                                                 |             | functional disruption                      |                                                                                                                                                | X                                                                | X                                                                                |
|                                                 |             | physical and functional<br>systemic damage |                                                                                                                                                | X                                                                | X                                                                                |
|                                                 | electricity | physical damage                            | PHYSICAL DAMAGE:<br>- observed damages: fell down<br>of trellis, removed cables along<br>riversides, damaged electrical<br>cabins<br>600,000 € |                                                                  |                                                                                  |

| EXPOSED SECTOR |                                         | SPATIAL SCALES OF ANALYSIS              |                 |                                                                                                                                                                                                                                                       |                                                                           |
|----------------|-----------------------------------------|-----------------------------------------|-----------------|-------------------------------------------------------------------------------------------------------------------------------------------------------------------------------------------------------------------------------------------------------|---------------------------------------------------------------------------|
|                |                                         | Type of damage                          | Individual item | Municipality                                                                                                                                                                                                                                          | Meso - Macro scale<br>(Province, Region, Country)                         |
|                |                                         | functional disruption                   |                 | USERS WITHOUT ELECTRICITY AND DURATION OF DISRUPTION:<br>- 13 municipalities affected by the electrical service disruption<br>- number of users without electricity and number of hours without electrical service in each municipality (see Table 3) | NUMBER OF MUNICIPALITIES WITH ELECTRICITY DISRUPTION<br>15 municipalities |
|                |                                         | physical and functional systemic damage |                 | FUNCTIONAL DAMAGE:<br>prolonged disruption because of inaccessibility                                                                                                                                                                                 | X                                                                         |
|                |                                         | water and sewage                        | physical damage | PHYSICAL DAMAGE:<br>- observed damages at individual items: sewage pipelines, wells, purification plants, pumps, remote control devices<br>1.200.000 €                                                                                                |                                                                           |
|                | functional disruption                   |                                         |                 | X                                                                                                                                                                                                                                                     | X                                                                         |
|                | physical and functional systemic damage |                                         |                 | X                                                                                                                                                                                                                                                     | FUNCTIONAL DAMAGE:<br>disruption of wells because of inaccessibility      |
|                | public services                         | schools                                 | physical damage | PHYSICAL DAMAGE TO BUILDINGS<br>- type of damaged schools ( kindergartens, primary schools, high schools)<br>- type of damage to each school (e.g. building)<br>200.000 € in 7 municipalities                                                         |                                                                           |

| EXPOSED SECTOR | SPATIAL SCALES OF ANALYSIS              |                                         |                                                                                                                                                                                                        |                                                                                                                                   |              |
|----------------|-----------------------------------------|-----------------------------------------|--------------------------------------------------------------------------------------------------------------------------------------------------------------------------------------------------------|-----------------------------------------------------------------------------------------------------------------------------------|--------------|
|                | Type of damage                          | Individual item                         | Municipality                                                                                                                                                                                           | Meso - Macro scale<br>(Province, Region, Country)                                                                                 |              |
|                | functional disruption                   | X                                       | DAYS OF CLOSURE<br>- 39 schools remain closed after two days<br>- 7 schools remain closed after five days                                                                                              | not occurred                                                                                                                      |              |
|                | physical and functional systemic damage |                                         | X                                                                                                                                                                                                      | X                                                                                                                                 |              |
|                | health and care services                | physical damage                         | not occurred                                                                                                                                                                                           |                                                                                                                                   |              |
|                |                                         | functional disruption                   | not occurred                                                                                                                                                                                           | not occurred                                                                                                                      | not occurred |
|                |                                         | physical and functional systemic damage |                                                                                                                                                                                                        | INACCESSIBLE HOSPITALS:<br>Orvieto Hospital inaccessible for about 12 hours on the day of the flood event due to roads disruption | not occurred |
|                | governmental services                   | physical damage                         | PHYSICAL DAMAGE TO PUBLIC BUILDINGS<br>- damages to public buildings (educational buildings excluded): 1 sport facility; 3 governmental buildings; 5 public buildings.<br>70.000 € in 6 municipalities |                                                                                                                                   |              |
|                |                                         | functional disruption                   | not occurred                                                                                                                                                                                           | not occurred                                                                                                                      | not occurred |
|                |                                         | physical and functional systemic damage |                                                                                                                                                                                                        | X                                                                                                                                 | X            |

| EXPOSED SECTOR      |                                      | SPATIAL SCALES OF ANALYSIS              |                                                                                                                                                                                                                                                                                                                                                                                                                    |              |                                                   |
|---------------------|--------------------------------------|-----------------------------------------|--------------------------------------------------------------------------------------------------------------------------------------------------------------------------------------------------------------------------------------------------------------------------------------------------------------------------------------------------------------------------------------------------------------------|--------------|---------------------------------------------------|
|                     |                                      | Type of damage                          | Individual item                                                                                                                                                                                                                                                                                                                                                                                                    | Municipality | Meso - Macro scale<br>(Province, Region, Country) |
| economic activities | agriculture                          | physical damage                         | PHYSICAL DAMAGE TO CROPS, STRUCTURES AND INFRASTRUCTURES:<br>- total cost to infrastructures:<br>12.000.000 €<br>- total cost to structures:<br>950.000 €                                                                                                                                                                                                                                                          |              |                                                   |
|                     |                                      | functional disruption                   | X                                                                                                                                                                                                                                                                                                                                                                                                                  |              |                                                   |
|                     |                                      | physical and functional systemic damage | X                                                                                                                                                                                                                                                                                                                                                                                                                  |              |                                                   |
|                     | industries and commercial activities | physical damage                         | PHYSICAL DAMAGE TO BUILDINGS AND CONTENTS:<br>- 167 investigated activities in 3 municipalities<br>- observed damages: doors and windows, floors, plasters, walls, damage due to humidity, plants, machineries, stokes, loss of memorabilia, vehicles, documents<br>- tot damage:<br>3.500.000 € + 400.000 €<br>(private contributions by trade union)<br><br>- total damage at regional level around: 5.000.000 € |              |                                                   |

| EXPOSED SECTOR                                      | Type of damage                          | SPATIAL SCALES OF ANALYSIS                                                                                                                                                                                                                                                                                                                                                                    |              |                                                   |
|-----------------------------------------------------|-----------------------------------------|-----------------------------------------------------------------------------------------------------------------------------------------------------------------------------------------------------------------------------------------------------------------------------------------------------------------------------------------------------------------------------------------------|--------------|---------------------------------------------------|
|                                                     |                                         | Individual item                                                                                                                                                                                                                                                                                                                                                                               | Municipality | Meso - Macro scale<br>(Province, Region, Country) |
|                                                     | functional disruption                   | <p>DISRUPTION OF BUSINESS:</p> <ul style="list-style-type: none"> <li>- 167 investigated activities in 3 municipalities</li> <li>- average business disruption 13 days</li> <li>- fully operative after 3 months</li> <li>- negative trends in the production for several months (uncountable)</li> </ul>                                                                                     | X            | X                                                 |
|                                                     | physical and functional systemic damage | X                                                                                                                                                                                                                                                                                                                                                                                             |              |                                                   |
| <b>private properties<br/>(residences and cars)</b> | physical damage                         | <p>PHYSICAL DAMAGE TO BUILDINGS AND CONTENTS:</p> <ul style="list-style-type: none"> <li>- 77 investigated buildings in 2 municipalities</li> <li>- observed damages: plasters, windows and doors, floors, electrical plants, furniture, clean-up (1-30 person/day), loss of memorabilia, cars</li> <li>- tot costs at regional level (19 municipalities) 3.000.000 € (17/04/2014)</li> </ul> |              |                                                   |
|                                                     | functional disruption                   | <p>USABILITY:</p> <ul style="list-style-type: none"> <li>- 77 investigated buildings in 2 municipalities</li> <li>- buildings were not usable for 2-7 days in average</li> </ul>                                                                                                                                                                                                              |              |                                                   |

| EXPOSED SECTOR                            |             | SPATIAL SCALES OF ANALYSIS              |                                                                                                                                                                                                                                                                                  |              |                                                         |
|-------------------------------------------|-------------|-----------------------------------------|----------------------------------------------------------------------------------------------------------------------------------------------------------------------------------------------------------------------------------------------------------------------------------|--------------|---------------------------------------------------------|
|                                           |             | Type of damage                          | Individual item                                                                                                                                                                                                                                                                  | Municipality | Meso - Macro scale<br>(Province, Region, Country)       |
| Environmental<br>and cultural<br>heritage | Environment | physical and functional systemic damage | USABILITY<br>- 175 isolated buildings in 10 locations because of damage to roads                                                                                                                                                                                                 |              |                                                         |
|                                           |             | loss of value                           |                                                                                                                                                                                                                                                                                  | X            |                                                         |
|                                           |             | physical damage                         | PHYSICAL DAMAGE TO GREEN PATHS AND GREEN AREAS:<br>70.000 €<br><br>PHYSICAL DAMAGE TO A NATURAL PARK<br>-touristic path, bridges, bird-watching houses, trees, fauna, damage to river banks and levees 150.000 € (estimated by the park)<br>- hydraulic network:<br>24.500.000 € | not occurred | PHYSICAL DAMAGE TO FAUNA DUE TO MIGRATION (UNCOUNTABLE) |
|                                           |             | functional disruption                   | DISRUPTION OF RECREATIONAL ACTIVITIES OF THE NATURAL PARK<br>- 1 month<br><br>LONG-TERM NEGATIVE TRENDS OF RECREATIONAL ACTIVITIES OF THE NATURAL PARK                                                                                                                           | not occurred | not occurred                                            |



| EXPOSED SECTOR    | Type of damage                          | SPATIAL SCALES OF ANALYSIS                                                        |                                                                        |                                                                                                                                                                                                                                                                                                             |
|-------------------|-----------------------------------------|-----------------------------------------------------------------------------------|------------------------------------------------------------------------|-------------------------------------------------------------------------------------------------------------------------------------------------------------------------------------------------------------------------------------------------------------------------------------------------------------|
|                   |                                         | Individual item                                                                   | Municipality                                                           | Meso - Macro scale<br>(Province, Region, Country)                                                                                                                                                                                                                                                           |
| cultural heritage | physical and functional systemic damage |                                                                                   | INDUSTRIAL TOXIC WASTE DISPOSAL:<br>1.000.000 € (above all in Orvieto) | not occurred                                                                                                                                                                                                                                                                                                |
|                   | physical damage                         | PHYSICAL DAMAGE:<br>observed damages: walls and historical buildings<br>600.000 € | not occurred                                                           | not occurred                                                                                                                                                                                                                                                                                                |
|                   | functional disruption                   | not occurred                                                                      | not occurred                                                           | not occurred                                                                                                                                                                                                                                                                                                |
|                   | physical and functional systemic damage |                                                                                   | X                                                                      | X                                                                                                                                                                                                                                                                                                           |
| Civil Protection  | costs of emergency services             |                                                                                   | COSTS OF EVACUATION, SHELTERS, RESCUE, RESTORATION, ETC.               | COSTS OF EVACUATION, SHELTERS, RESCUE, ETC.<br>- 14 Municipal Emergency Rooms open<br>- 1 Regional Emergency Rooms open<br>- 15 tactical operation centers open<br>- 45 Volunteer Organizations activated<br>- 500 Volunteers (50 Volunteers/day) activated<br>- total cost of evacuation: around 150.000 € |

6

7 **Legend:**

8 X= data and/or monetary value desired, but currently not available
